# Supplementary material
Source: PubMed Central journal article supplement (PMC6755756)
Supplement: JB.00312-19-s0001.pdf [file JB.00312-19-s0001.pdf]

## Supplemental Material

### **The sRNA PinT Contributes to PhoP-mediated regulation of the SPI1 T3SS in *Salmonella enterica* serovar Typhimurium**

Kyungsub Kim<sup>1</sup>, Alexander D. Palmer<sup>1</sup>, Carin K. Vanderpool<sup>1</sup> and James M. Slauch<sup>1#</sup>

<sup>1</sup>. Department of Microbiology University of Illinois at Urbana-Champaign, 601 S. Goodwin Ave, Urbana IL, 61801

#Corresponding Author. E-mail: [slauch@illinois.edu](mailto:slauch@illinois.edu)

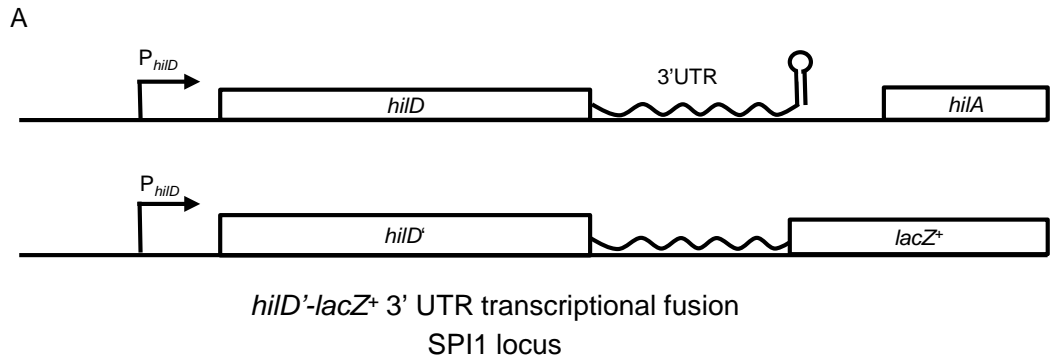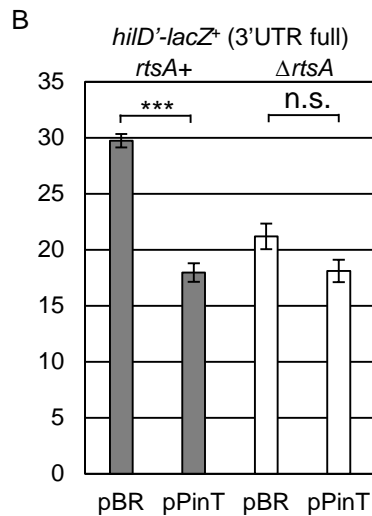

**Figure S1. PinT does not affect *hilD* expression through the 3' UTR.**

A. Schematic representation of the *hilD*'-*lacZ*<sup>+</sup> 3'UTR fusion. The *lacZ* gene is integrated just upstream of the *hilD* mRNA terminator. This is associated with a deletion that removes through *hilA*. B.  $\beta$ -galactosidase activity in *Salmonella* strains containing the *hilD*'-*lacZ*<sup>+</sup> transcriptional fusion in either *rtsA*<sup>+</sup> (grey) or  $\Delta$ *rtsA* (white) and either the empty vector or plasmids overexpressing PinT grown in SPI1 inducing conditions.  $\beta$ -galactosidase activity units are defined as ( $\mu$ mol of ONP formed  $\text{min}^{-1}$ )  $\times 10^6 / (\text{OD}_{600} \times \text{ml of cell suspension})$  and are reported as mean  $\pm$  standard deviation where  $n = 3$ . *P* values (unpaired *t* test) are indicated as follows: \*, *P* < 0.05; \*\*, *P* < 0.01; \*\*\*, *P* < 0.001. Strains used: JS2351 and JS2352, each with plasmid pBRplac or pPinT.

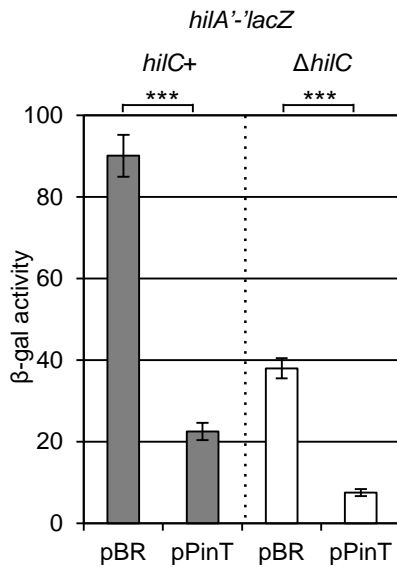

**Figure S2. PinT represses *hilA* translation independent of HilC.**

β-galactosidase activity in *Salmonella* strains containing the *hilA*'-*lacZ* translational fusion in either *hilC*<sup>+</sup> (grey) or Δ*hilC* (white) and either the empty vector or plasmids overexpressing PinT grown in SPI1 inducing conditions. β-galactosidase activities are reported as mean ± standard deviation where n = 3. P values (unpaired *t* test) are indicated as follows: \*, P < 0.05; \*\*, P < 0.01; \*\*\*, P < 0.001. Strains used: JS2333 and JS2353, each with plasmid pBRplac or pPinT.

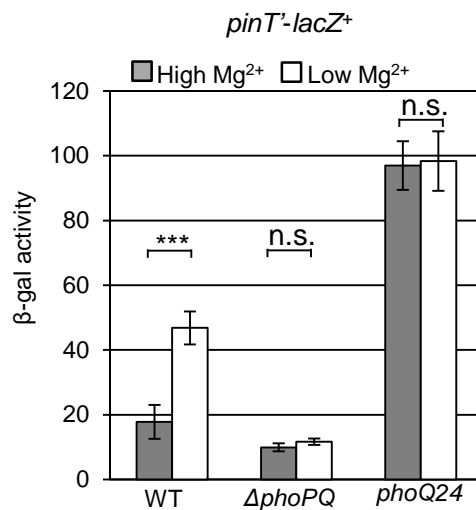

**Figure S3. The PhoPQ two-component system activates the expression of PinT.**  $\beta$ -galactosidase activity in *Salmonella* strains containing the *pinT'-lacZ*<sup>+</sup> transcriptional fusion in either wild type or the indicated mutant background. The strains were grown in either PhoPQ-noninducing (10 mM Mg<sup>2+</sup>) or -inducing conditions (10  $\mu$ M Mg<sup>2+</sup>) in N-minimal medium.  $\beta$ -galactosidase activities are reported as mean  $\pm$  standard deviation where n = 3. *P* values (unpaired *t* test) are indicated as follows: \*, *P* < 0.05; \*\*, *P* < 0.01; \*\*\*, *P* < 0.001. Strains used: JS2355, JS2357 and JS2356.

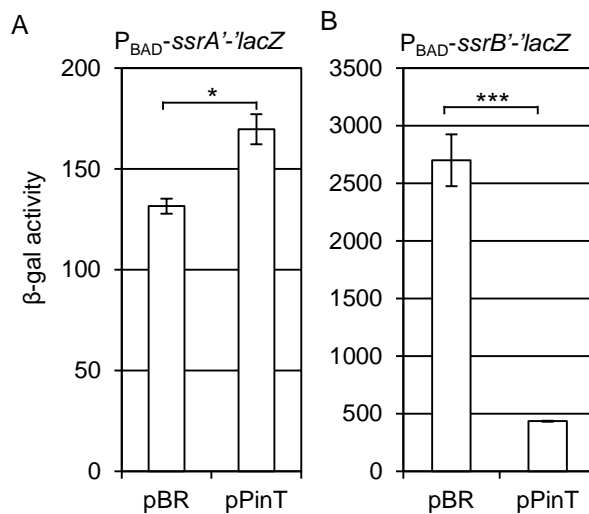

**Figure S4. PinT directly regulates the expression of SPI2 T3SS through repressing *ssrB* translation.**

$\beta$ -galactosidase activity in *E. coli* strains containing (A)  $P_{BAD-ssrA'}$ - $lacZ$  or (B)  $P_{BAD-ssrB'}$ - $lacZ$  translational fusion and plasmids overexpressing PinT grown in the presence of 100  $\mu$ M IPTG and 0.001% arabinose to induce the sRNA expression and the fusion *lacZ* protein expression, respectively.  $\beta$ -galactosidase activities are reported as mean  $\pm$  standard deviation where  $n = 3$ . *P* values (unpaired *t* test) are indicated as follows: \*,  $P < 0.05$ ; \*\*,  $P < 0.01$ ; \*\*\*,  $P < 0.001$ . Strains used: JMS6508 and JMS6509, each with plasmid pBRplac or pPinT.

**Table S1.** Conservation of genes in the tRNA-PheR island in representative *Salmonella*.

| Serovar/<br>Strain     | % identity <sup>a</sup> to indicated <i>S. Typhimurium</i> 14028 gene |                        |                        |                        |                                |      |                |
|------------------------|-----------------------------------------------------------------------|------------------------|------------------------|------------------------|--------------------------------|------|----------------|
|                        | PhoN<br>STM14_5<br>193                                                | RtsA<br>STM14_5<br>188 | RtsB<br>STM14_5<br>187 | RtsC<br>STM14<br>_5186 | RtsD<br>STM14<br>_5185         | PinT | STM14<br>_5184 |
| Typhimurium<br>LT2     | 100%                                                                  | 100%                   | 100%                   | 100%                   | 100%                           | 100% | 100%           |
| Enteritidis<br>BAA-708 | 98%                                                                   | 99%                    | 99%                    | Pseudogene             | Pseudogene                     | 100% | 100%           |
| Gallinarum<br>9184     | 98%                                                                   | 99%                    | 97%                    | Pseudogene             | Pseudogene                     | ---  | 99%            |
| Typhi<br>TY2           | 95%                                                                   | 100%                   | 100%                   | Pseudogene             | In frame<br>insertion<br>(61%) | 100% | 99%            |
| Bongori<br>SA19983605  | ---                                                                   | 77%                    | 94%                    | ---                    | ---                            | ---  | ---            |

<sup>a</sup>Identity is denoted at the amino acid level for ORFS and at the nucleotide level for PinT.

**Table S2.** Bacterial strains and plasmids used in this study.

| <i>Salmonella</i> <sup>a</sup> or <i>E. coli</i> strain | Genotype                                                                                                                                                                  | Deletion endpoint <sup>b</sup> | Source or reference |
|---------------------------------------------------------|---------------------------------------------------------------------------------------------------------------------------------------------------------------------------|--------------------------------|---------------------|
| <i>Salmonella</i>                                       |                                                                                                                                                                           |                                |                     |
| 14028                                                   | Wild type                                                                                                                                                                 |                                | ATCC <sup>c</sup>   |
| PM1205                                                  | MG1655 <i>mal::lacI<sup>q</sup></i> , $\Delta$ <i>araBAD</i> <i>araC</i> <sup>+</sup> , <i>lacI</i> :: <i>P<sub>BAD</sub>-cat-sacB:lacZ</i> , <i>miniλtet<sup>R</sup></i> |                                | (1)                 |
| JS2333                                                  | $\phi$ ( <i>hilA</i> '-' <i>lacZ</i> ) <i>hyb116</i>                                                                                                                      | 3040173 - 3038966              |                     |
| JS892                                                   | $\phi$ ( <i>hilD</i> '-' <i>lacZ</i> ) <i>hyb139</i>                                                                                                                      |                                | (2)                 |
| JS2334                                                  | $\phi$ ( <i>rtsA</i> '-' <i>lacZ</i> ) <i>hyb6</i>                                                                                                                        | 4573742 - 4574496              |                     |
| JS248                                                   | $\Delta$ <i>rtsA5</i>                                                                                                                                                     | 4561755–4560884                | (3)                 |
| JS2117                                                  | <i>rne131::Cm</i>                                                                                                                                                         |                                | (4)                 |
| JS2335                                                  | $\phi$ ( <i>hilA</i> '-' <i>lacZ</i> ) <i>hyb116 rne131::Cm</i>                                                                                                           |                                |                     |
| JS2336                                                  | $\phi$ ( <i>rtsA</i> '-' <i>lacZ</i> ) <i>hyb6 rne131::Cm</i>                                                                                                             |                                |                     |
| JS2337                                                  | $\phi$ ( <i>hilA</i> '-' <i>lacZ</i> ) <i>hyb116 ΔrtsA5</i>                                                                                                               |                                |                     |
| JS2338                                                  | $\phi$ ( <i>hilA</i> '-' <i>lacZ</i> ) <i>hyb116 ΔrtsA5 rne131::Cm</i>                                                                                                    |                                |                     |
| JS325                                                   | $\phi$ ( <i>rtsB</i> '-' <i>lacZ</i> <sup>+</sup> )6                                                                                                                      |                                | (3)                 |
| JS2339                                                  | $\phi$ ( <i>rtsB</i> '-' <i>lacZ</i> <sup>+</sup> )6 <i>rne131::Cm</i>                                                                                                    |                                |                     |
| JS542                                                   | <i>phoQ24</i>                                                                                                                                                             |                                | (5)                 |
| JS2192                                                  | <i>phoQ24 ycfD612::Cm</i>                                                                                                                                                 |                                | (6)                 |
| JS2340                                                  | $\Delta$ <i>pinT::tet</i>                                                                                                                                                 | 4572735 - 4572805              |                     |
| JS2341                                                  | $\phi$ ( <i>hilA</i> '-' <i>lacZ</i> ) <i>hyb116 ΔpinT::tet</i>                                                                                                           |                                |                     |
| JS2342                                                  | $\phi$ ( <i>hilA</i> '-' <i>lacZ</i> ) <i>hyb116 phoQ24 ycfD612::Cm</i>                                                                                                   |                                |                     |
| JS2343                                                  | $\phi$ ( <i>hilA</i> '-' <i>lacZ</i> ) <i>hyb116 ΔpinT::tet phoQ24 ycfD612::Cm</i>                                                                                        |                                |                     |

|        |                                                             |                   |     |
|--------|-------------------------------------------------------------|-------------------|-----|
| JS2344 | $\phi(rtsA'-'lacZ)hyb6 \Delta pinT::tet$                    |                   |     |
| JS2345 | $\phi(rtsA'-'lacZ)hyb6 phoQ24 ycfD612::Cm$                  |                   |     |
| JS2346 | $\phi(rtsA'-'lacZ)hyb6 \Delta pinT::tet phoQ24 ycfD612::Cm$ |                   |     |
| TH4054 | LT2 <i>flhC5456::MudJ</i>                                   |                   | (7) |
| JS2347 | 14028 <i>flhC5456::MudJ</i>                                 |                   |     |
| JS2348 | $\Delta crp101::Cm$                                         | 3629505 - 3630136 |     |
| JS2349 | 14028 <i>flhC5456::MudJ \Delta crp::Cm</i>                  |                   |     |
| JS696  | $\phi(fliZ'-'lacZ^+)8042$                                   | 1759979 - 1759907 | (8) |
| JS746  | <i>fliZ8041::tet</i>                                        | 2044136 - 2044684 | (8) |
| JS2350 | $\phi(hilA'-'lacZ)hyb116 fliZ8041::tet$                     |                   |     |
| JS2351 | $\phi(hilD3'UTR-'lacZ^+)116$                                | 3039273 - 3041759 |     |
| JS2352 | $\phi(hilD-'lacZ^+)3'UTR ArtsA5$                            |                   |     |
| JS252  | $\Delta hilC113::Cm$                                        | 3012135 - 3012976 | (3) |
| JS2353 | $\phi(hilA'-'lacZ)hyb116 \Delta hilC113::Cm$                |                   |     |
| JS2354 | $\Delta pinT2::Cm$                                          | 4572745 - 4572805 |     |
| JS2355 | $\phi(pinT2'-'lacZ^+)$                                      |                   |     |
| JS1068 | $\Delta phoPQ::cm$                                          | 1317242 - 1319310 | (9) |
| JS2356 | $\phi(pinT'-'lacZ^+) phoQ24 ycfD612::Cm$                    |                   |     |
| JS2357 | $\phi(pinT'-'lacZ^+) \Delta phoPQ::cm$                      |                   |     |
| JS749  | <i>attλ::pDX1::hilA'-'lacZ^+</i>                            |                   | (8) |
| JS2358 | <i>attλ::pDX1::hilA'-'lacZ^+ \Delta pinT::Cm</i>            |                   |     |
| JS2359 | <i>attλ::pDX1::hilA'-'lacZ^+ \Delta spi1-2916::FRT</i>      |                   |     |



|                |                                                                               |  |                  |
|----------------|-------------------------------------------------------------------------------|--|------------------|
| JS2360         | <i>attλ::pDXI::hilA'-lacZ<sup>+</sup> Δspi1-2916::FRT ΔpinT::Cm</i>           |  |                  |
| <i>E. coli</i> |                                                                               |  |                  |
| JMS6503        | PM1205 <i>lacI'::P<sub>BAD</sub>-hilC'-lacZ</i>                               |  | (4)              |
| JMS6504        | PM1205 <i>lacI'::P<sub>BAD</sub>-rtsA'-lacZ</i>                               |  | (4)              |
| JMS6505        | PM1205 <i>lacI'::P<sub>BAD</sub>-hilA'-lacZ</i>                               |  | (4)              |
| JMS6506        | PM1205 <i>lacI'::P<sub>BAD</sub>-hilAmt1'-lacZ</i>                            |  |                  |
| JMS6507        | PM1205 <i>lacI'::P<sub>BAD</sub>-rtsAmt2'-lacZ</i>                            |  |                  |
| JMS6508        | PM1205 <i>lacI'::P<sub>BAD</sub>-ssrA'-lacZ</i>                               |  |                  |
| JMS6509        | PM1205 <i>lacI'::P<sub>BAD</sub>-ssrB'-lacZ</i>                               |  |                  |
| <b>Plasmid</b> | <b>Relevant Features</b>                                                      |  | <b>Reference</b> |
| pBRplac        | Amp <sup>R</sup> , <i>plac</i> promoter based expression vector               |  | (10)             |
| pPinT          | AatII-EcoRI pinT( <i>Salmonella</i> ) containing fragment cloned into pBRplac |  |                  |
| pPinT-mt1      | G7C, G8C, A9T, T10A, T11A, A12T site directed mutation in pPinT               |  |                  |
| pPinT-mt2      | G19T, G20T, T21A, G22C, T23A site directed mutation in pPinT                  |  |                  |

a All *Salmonella* strains are isogenic derivatives of *S. enterica* serovar Typhimurium strain 14028.

b Numbers indicate the base pairs that are deleted (inclusive) as defined in the *S. enterica* serovar Typhimurium 14028 genome sequence (National Center for Biotechnology Information).

c ATCC, American Type Culture Collection.

**Table S3.** Primers used in this study.

| Name                        | Primer Sequence                                                                        |
|-----------------------------|----------------------------------------------------------------------------------------|
| F-AatII-PinT                | 5'GATCGACGTC AGTAACGGATTACTTTGTGGTGTAG3'                                               |
| R-EcoRI-PinT                | 5'GATCGAATTC TGTTAATTATTACAGAGAGAGTTAATTTAT3'                                          |
| mt1-PinT-F                  | 5'GACGTCAGTAACCCTAATCTTTGTGGTGTAGCGTAACGGTAATTGTCCTCC3'                                |
| mt1-PinT-R                  | 5'GGAGGACAATTACCGTTACGCTACACCACAAAGATTAGGGTTACTGACGTC3'                                |
| mt2-PinT-F                  | 5'GACGTCAGTAACGGATTACTTTGTTTACAAGCGTAACGGTAATTGTCCTCC3'                                |
| mt2-PinT-R                  | 5'GAGGACAATTACCGTTACGCTTGTAACAAAGTAATCCGTTACTGACGTC3'                                  |
| F-hilA'-lacZ<br>E. coli     | 5'ACGCTTTTTATCGCAACTCTCTACTGTTTCTCCATAAACTAATCTCTATTGCAAT<br>GAGG3'                    |
| R-hilAmt1'-<br>lacZ E. coli | 5'GTTTTCCAGTCACGACGTTGTAAAACGACCGATACAGGAACACCTAATAAATG<br>TGGCAT3'                    |
| F-rtsA'-lacZ<br>E. coli     | 5'TTTTATCGCAACTCTCTACTGTTTCTCCATAGAAATGCAATATAAAATAGCATT<br>TCCAT3'                    |
| R-rtsAmt2'-<br>lacZ E. coli | 5'CCCAGTCACGACGTTGTAAAACGACGACAGGTGAGGGATTAATACTTTTAGCA<br>TGATAATTCCTTTTATTACCACAGC3' |
| KO-pinT-TC-F                | 5'CATTGTTGGGGATATTTATGTTTTACTTACCTCAGTAACGGAT<br>CCCTCTGGGTTATCA3'                     |
| KO-pinT-TC-R                | 5'TGTTAATTATTACAGAGAGAGTTAATTTATAAAAAAAGC<br>TAGGTGGGTACGTTGGAGCC3'                    |
| KO-crp-F                    | 5'ATGGTGCTTGGCAAACCGCAAACAGACCCGACTCTTGAATGGTTC<br>TGTAGGCTGGAGCTG3'                   |
| KO-crp-R                    | 5'TTAACGGGTGCCGTAGACGACGATGGTCTTGCC CATATGAATATCCTC3'                                  |
| KO-hilD3-F                  | 5'TGCCTTATTCACAGCGTAAGAATTCGTCCAGATGACACTATCTCC<br>TGTAGGCTGGAGCTG3'                   |
| KO-hilD3-R                  | 5'CAACCAGATTACGATGATAAAAAAATAATGCATATCTCCTCTCTC<br>CATATGAATATCCTC3'                   |
| KO-pinT-F                   | 5'TTCATTGTTGGGGATATTTATGTTTTACTTACCTCAGTAACGGAT<br>TGTAGGCTGGAGCTG3'                   |
| KO-pinT-R                   | 5'TTGTCTGTTAATTATTACAGAGAGAGTTAATTTATAAAAAAAGC<br>CATATGAATATCCTC3'                    |
| R-ssrB'-lacZ<br>E. coli     | 5'TAACGCCAGGGTTTTCCAGTCACGACGTTGTAAAACGAC<br>TTTAAAATGAGGCCAGGGTA3'                    |
| F-ssrB'-lacZ<br>E. coli     | 5'ACCTGACGCTTTTTATCGCAACTCTCTACTGTTTCTCCAT<br>GGTATGCTATGTCATAGACA3'                   |
| R-ssrA'-lacZ<br>E. coli     | 5'TAACGCCAGGGTTTTCCAGTCACGACGTTGTAAAACGAC<br>CCAAATAATTATTGTTGTTA3'                    |
| F-ssrA'-lacZ<br>E. coli     | 5'ACCTGACGCTTTTTATCGCAACTCTCTACTGTTTCTCCAT<br>ACATCGCCATCTTATTTAAA3'                   |

## Reference

1. Mandin P, Gottesman S. 2009. A genetic approach for finding small RNAs regulators of genes of interest identifies RybC as regulating the DpiA/DpiB two-component system. *Mol Microbiol* 72:551-65.
2. Chubiz JE, Golubeva YA, Lin D, Miller LD, Slauch JM. 2010. FliZ regulates expression of the *Salmonella* pathogenicity island 1 invasion locus by controlling HilD protein activity in *Salmonella enterica* serovar Typhimurium. *J Bacteriol* 192:6261-70.
3. Ellermeier CD, Slauch JM. 2003. RtsA and RtsB coordinately regulate expression of the invasion and flagellar genes in *Salmonella enterica* serovar Typhimurium. *J Bacteriol* 185:5096-108.
4. Kim K, Golubeva YA, Vanderpool CK, Slauch JM. 2019. Oxygen-dependent regulation of SPI1 type three secretion system by small RNAs in *Salmonella enterica* serovar Typhimurium. *Molecular Microbiology* 111:570-587.
5. Miller SI, Mekalanos JJ. 1990. Constitutive expression of the *phoP* regulon attenuates *Salmonella* virulence and survival within macrophages. *J Bacteriol* 172:2485-90.
6. Palmer AD, Kim K, Slauch JM. 2019. PhoP-mediated repression of the SPI1 T3SS in *Salmonella enterica* serovar Typhimurium. *J Bacteriol* 201:e00264-19. doi:10.1128/jb.00264-19
7. Clegg S, Hughes KT. 2002. FimZ is a molecular link between sticking and swimming in *Salmonella enterica* serovar Typhimurium. *J Bacteriol* 184:1209-13.
8. Lin D, Rao CV, Slauch JM. 2008. The *Salmonella* SPI1 type three secretion system responds to periplasmic disulfide bond status via the flagellar apparatus and the RcsCDB system. *J Bacteriol* 190:87-97.
9. Golubeva YA, Slauch JM. 2006. *Salmonella enterica* serovar Typhimurium periplasmic superoxide dismutase SodCI is a member of the PhoPQ regulon and is induced in macrophages. *J Bacteriol* 188:7853-61.
10. Guillier M, Gottesman S. 2006. Remodelling of the *Escherichia coli* outer membrane by two small regulatory RNAs. *Mol Microbiol* 59:231-47.
